# Supplementary material for: Gut microbiota and type 1 diabetes: a two-sample bidirectional Mendelian randomization study
Source: Front Cell Infect Microbiol. 2023 May 29;13:1163898. doi: 10.3389/fcimb.2023.1163898 (PMC10258312; doi:10.3389/fcimb.2023.1163898)
Supplement: Supplementary file 1 [file Table_1.xlsx]

## Sheet: Supplementary table 1
Supplementary table 1. Overview of gut microbiota involved in the study
Phylum	N.phylum	Class	N.class	Order	N.order	Family	N.family	Genus	N.genus	Totall
Actinobacteria	1	Actinobacteria, Coriobacteriia	2	Actinomycetales, Bifidobacteriales, Coriobacteriales	3	Actinomycetaceae, Bifidobacteriaceae, Coriobacteriaceae	3	Actinomyces, Adlercreutzia, Bifidobacterium, Collinsella, Eggerthella, Enterorhabdus, Gordonibacter, Olsenella, Senegalimassilia, Slackia	10	19
Bacteroidetes	1	Bacteroidia	1	Bacteroidales	1	Bacteroidaceae, Bacteroidales S24 7group, Porphyromonadaceae, Prevotellaceae, Rikenellaceae	5	Alistipes, Alloprevotella, Bacteroides, Barnesiella, Butyricimonas, Coprobacter, Odoribacter, Parabacteroides, Paraprevotella, Prevotella7, Prevotella9, Rikenellaceae RC9 gut group	12	20
Firmicutes	1	Bacilli, Clostridia, Erysipelotrichia, Negativicutes	4	Bacillales, Clostridiales, Erysipelotrichales, Lactobacillales, Selenomonadales	5	Acidaminococcaceae, Christensenellaceae, Clostridiaceae1, Clostridiales vadin BB60 group, Defluviitaleaceae, Erysipelotrichaceae, Family XI, Family XIII, Lactobacillaceae, Peptococcaceae, Peptostreptococcaceae, Ruminococcaceae, Streptococcaceae, Veillonellaceae	14	Allisonella, Anaerofilum, Anaerostipes, Anaerotruncus, Blautia, Butyricicoccus, Butyrivibrio, Candidatus Soleaferrea, Catenibacterium, Christensenellaceae R 7group, Clostridium innocuum group, Clostridium sensustricto1, Coprococcus1, Coprococcus2, Coprococcus3, Defluviitaleaceae, Dialister, Dorea, Eisenbergiella, Erysipelatoclostridium, Erysipelotrichaceae UCG003, Eubacterium brachy, Eubacterium …	87	111
Proteobacteria	1	Alphaproteobacteria, Betaproteobacteria, Deltaproteobacteria, Gammaproteobacteria	4	Burkholderiales, Desulfovibrionales, Enterobacterales, Pasteurellales, Rhodospirillales	5	Alcaligenaceae, Desulfovibrionaceae, Enterobacteriaceae, Oxalobacteraceae, Pasteurellaceae, Rhodospirillaceae	6	Bilophila, Desulfovibrio, Escherichia Shigella, Haemophilus, Oxalobacter, Parasutterella, Sutterella	7	23
Cyanobacteria	1	/	0	/	0	/	0	/	0	1
Euryarchaeota	1	Methanobacteria	1	Methanobacteriales	1	Methanobacteriaceae	1	Methanobrevibacter	1	5
Lentisphaerae	1	Lentisphaeria	1	Victivallales	1	Lentisphaeria, Victivallaceae	2	Victivallis	1	6
Tenericutes	1	Mollicutes	1	Mollicutes RF9, NB1n	2	/	0	/	0	4
Verrucomicrobia	1	Verrucomicrobiae	1	Verrucomicrobiales	1	Verrucomicrobiaceae	1	Akkermansia	1	5
Other taxa	0	Melainabacteria	1	Gastranaerophilales	1	/	0	/	0	2
Totall	9	/	16	/	20	/	32	/	119	196
Note: N. phylum, the number of phyla; N.class, the number of classes; N.order, the number of orders; N.family, the number of families; N.genus, the number of genera

## Sheet: Supplementary table 2
Supplementary table 2. Mendelian randomization analysis results between Actinobacteria and T1D
Taxa	Gut microbiota	Trait	MR analysis												Reverse MR analysis
			Nsnp	Methods	Beta	SE	OR (95%CI)	P value	PFDR	Heterogeneity		Horizontal pleiotropy			Nsnp	Methods	Beta	SE	OR (95%CI)	P value	Heterogeneity		Horizontal pleiotropy
										Cochran’s Q	P value	Egger intercept	SE	P value							Cochran’s Q	P value	Egger intercept	SE	P value
phylum	Actinobacteria	T1D	15	MR Egger	-0.33	0.38	0.72(0.34-1.51)	0.402	0.402
				Weighted median	-0.14	0.12	0.87(0.69-1.09)	0.237	0.237
				Inverse variance weighted	-0.14	0.09	0.87(0.73-1.03)	0.115	0.115
				Weighted mode	-0.17	0.16	0.85(0.62-1.15)	0.314	0.314
class	Actinobacteria	T1D	14	MR Egger	-0.09	0.27	0.91(0.54-1.54)	0.743	0.853
				Weighted median	-0.10	0.11	0.90(0.73-1.11)	0.327	0.996
				Inverse variance weighted	-0.08	0.08	0.92(0.79-1.09)	0.345	0.735
				Weighted mode	-0.16	0.13	0.85(0.65-1.12)	0.229	0.999
class	Coriobacteriia	T1D	12	MR Egger	-0.21	0.43	0.81(0.35-1.88)	0.64	0.853
				Weighted median	-0.04	0.13	0.96(0.75-1.24)	0.77	0.996
				Inverse variance weighted	-0.07	0.1	0.94(0.78-1.13)	0.49	0.735
				Weighted mode	0	0.2	1.00(0.65-1.54)	0.999	0.999
order	Actinomycetales	T1D	5	MR Egger	0.19	0.2	1.21(0.82-1.78)	0.412	0.853
				Weighted median	0.05	0.12	1.05(0.84-1.32)	0.673	0.996
				Inverse variance weighted	-0.08	0.1	0.93(0.76-1.12)	0.427	0.735
				Weighted mode	0.05	0.12	1.05(0.82-1.34)	0.712	0.999
order	Bifidobacteriales	T1D	12	MR Egger	0.05	0.26	1.05(0.63-1.73)	0.864	0.915
				Weighted median	-0.02	0.11	0.98(0.80-1.20)	0.864	0.996
				Inverse variance weighted	0.08	0.07	1.08(0.94-1.25)	0.287	0.735
				Weighted mode	-0.06	0.12	0.94(0.73-1.21)	0.622	0.999
order	Coriobacteriales	T1D	12	MR Egger	-0.21	0.43	0.81(0.35-1.88)	0.64	0.853
				Weighted median	-0.04	0.13	0.96(0.75-1.24)	0.776	0.996
				Inverse variance weighted	-0.07	0.1	0.94(0.78-1.13)	0.49	0.735
				Weighted mode	0	0.22	1.00(0.65-1.53)	0.999	0.999
family	Actinomycetaceae	T1D	5	MR Egger	0.19	0.2	1.21(0.82-1.78)	0.41	0.853
				Weighted median	0.05	0.12	1.05(0.83-1.34)	0.664	0.996
				Inverse variance weighted	-0.08	0.1	0.93(0.76-1.12)	0.428	0.735
				Weighted mode	0.05	0.12	1.05(0.83-1.33)	0.729	0.999
family	Bifidobacteriaceae	T1D	11	MR Egger	0.12	0.25	1.13(0.69-1.85)	0.636	0.853
				Weighted median	0	0.11	1.00(0.82-1.23)	0.986	0.996
				Inverse variance weighted	0.11	0.08	1.11(0.96-1.30)	0.159	0.735
				Weighted mode	-0.06	0.12	0.95(0.74-1.21)	0.654	0.999
family	Coriobacteriaceae	T1D	12	MR Egger	-0.21	0.43	0.81(0.35-1.88)	0.64	0.853
				Weighted median	-0.04	0.13	0.96(0.75-1.24)	0.772	0.996
				Inverse variance weighted	-0.07	0.1	0.94(0.78-1.13)	0.49	0.735
				Weighted mode	0	0.22	1.00(0.65-1.53)	0.999	0.999
genus	Actinomyces	T1D	7	MR Egger	0.07	0.18	1.08(0.76-1.53)	0.693	0.853
				Weighted median	-0.10	0.1	0.91(0.74-1.11)	0.349	0.996
				Inverse variance weighted	-0.14	0.07	0.87(0.76-1.01)	0.065	0.585
				Weighted mode	0.02	0.16	1.02(0.75-1.38)	0.921	0.999
genus	Adlercreutzia	T1D	7	MR Egger	0.25	0.5	1.28(0.48-3.45)	0.642	0.853
				Weighted median	0.05	0.11	1.05(0.84-1.31)	0.682	0.996
				Inverse variance weighted	0.05	0.09	1.05(0.89-1.24)	0.583	0.737
				Weighted mode	0.05	0.17	1.05(0.75-1.47)	0.781	0.999
genus	Bifidobacterium	T1D	12	MR Egger	0.11	0.19	1.12(0.77-1.61)	0.571	0.853
				Weighted median	-0.07	0.1	0.93(0.77-1.13)	0.473	0.996
				Inverse variance weighted	0.01	0.07	1.01(0.87-1.16)	0.903	0.937
				Weighted mode	-0.05	0.11	0.95(0.76-1.19)	0.666	0.999
genus	Collinsella	T1D	9	MR Egger	0.13	0.4	1.14(0.52-2.48)	0.758	0.853
				Weighted median	-0.04	0.14	0.96(0.73-1.28)	0.797	0.996
				Inverse variance weighted	-0.03	0.1	0.97(0.79-1.18)	0.738	0.83
				Weighted mode	0.01	0.22	1.01(0.65-1.57)	0.956	0.999
genus	Eggerthella	T1D	9	MR Egger	-0.27	0.38	0.76(0.36-1.61)	0.5	0.853
				Weighted median	0.01	0.09	1.01(0.85-1.19)	0.93	0.996
				Inverse variance weighted	0.01	0.08	1.01(0.86-1.18)	0.937	0.937
				Weighted mode	-0.00	0.13	1.00(0.78-1.28)	0.988	0.999
genus	Enterorhabdus	T1D	6	MR Egger	0.46	0.23	1.58(1.01-2.48)	0.113	0.853
				Weighted median	0.06	0.12	1.06(0.84-1.35)	0.612	0.996
				Inverse variance weighted	0.05	0.1	1.05(0.86-1.28)	0.614	0.737
				Weighted mode	0.21	0.17	1.23(0.88-1.71)	0.283	0.999
genus	Gordonibacter	T1D	10	MR Egger	0.02	0.19	1.02(0.70-1.47)	0.932	0.932
				Weighted median	-0.00	0.06	1.00(0.89-1.12)	0.996	0.996
				Inverse variance weighted	-0.03	0.05	0.97(0.89-1.07)	0.586	0.737
				Weighted mode	0.02	0.09	1.02(0.86-1.20)	0.851	0.999
genus	Olsenella	T1D	11	MR Egger	0.21	0.15	1.23(0.92-1.64)	0.197	0.853	10.007	0.44	-0.015	0.02	0.457	19	MR Egger	-0.14	0.12	0.87(0.68-1.10)	0.254	24.238	0.147	0.015	0.018	0.437
				Weighted median	0.06	0.06	1.06(0.94-1.20)	0.31	0.996							Weighted median	-0.14	0.06	0.87(0.78-0.98)	0.022
				Inverse variance weighted	0.1	0.04	1.10(1.01-1.20)	0.027	0.486							Inverse variance weighted	-0.05	0.05	0.95(0.87-1.04)	0.237
				Weighted mode	0.04	0.12	1.04(0.83-1.29)	0.759	0.999							Weighted mode	-0.14	0.07	0.87(0.76-0.99)	0.051
genus	Senegalimassilia	T1D	5	MR Egger	0.84	0.37	2.32(1.12-4.82)	0.11	0.853
				Weighted median	0.01	0.13	1.01(0.78-1.30)	0.927	0.996
				Inverse variance weighted	0.09	0.11	1.09(0.88-1.35)	0.418	0.735
				Weighted mode	0.01	0.15	1.01(0.74-1.38)	0.937	0.999
genus	Slackia	T1D	5	MR Egger	-0.50	0.67	0.61(0.16-2.27)	0.511	0.853
				Weighted median	-0.08	0.12	0.92(0.74-1.16)	0.502	0.996
				Inverse variance weighted	-0.09	0.1	0.91(0.74-1.12)	0.391	0.735
				Weighted mode	-0.03	0.15	0.97(0.72-1.30)	0.848	0.999
Note: Nsnp, the number of snps involved; MR analysis, Mendelian randomization analysis. In the MR analysis, gut microbiota was treated as the exposure, T1D was treated as the outcome. In the reverse MR analysis, T1D was treated as the exposure, gut microbiota was treated as the outcome.

## Sheet: Supplementary table 3
Supplementary table 3. Mendelian randomization analysis results between Bacteroidetes and T1D
Taxa	Gut microbiota	Trait	MR analysis												Reverse MR analysis
			Nsnp	Methods	Beta	SE	OR (95%CI)	P value	PFDR	Heterogeneity		Horizontal pleiotropy			Nsnp	Methods	Beta	SE	OR (95%CI)	P value	Heterogeneity		Horizontal pleiotropy
										Cochran’s Q	P value	Egger intercept	SE	P value							Cochran’s Q	P value	Egger intercept	SE	P value
phylum	Bacteroidetes	T1D	10	MR Egger	-0.28	0.29	0.75(0.43-1.32)	0.352	0.352	6.344	0.705	0.036	0.019	0.099	19	MR Egger	-0.05	0.05	0.95(0.85-1.05)	0.342
				Weighted median	0.21	0.15	1.24(0.94-1.64)	0.146	0.146							Weighted median	-0.02	0.03	0.98(0.93-1.03)	0.407
				Inverse variance weighted	0.21	0.11	1.24(1.01-1.53)	0.044	0.044							Inverse variance weighted	-0.01	0.02	0.99(0.95-1.03)	0.648
				Weighted mode	0.24	0.23	1.27(0.82-1.97)	0.322	0.322							Weighted mode	-0.02	0.03	0.98(0.92-1.04)	0.486
calss	Bacteroidia	T1D	13	MR Egger	-0.11	0.26	0.90(0.54-1.50)	0.682	0.864	6.528	0.887	0.025	0.017	0.176	19	MR Egger	-0.05	0.05	0.95(0.86-1.06)	0.355
				Weighted median	0.22	0.13	1.25(0.97-1.60)	0.084	0.488							Weighted median	-0.02	0.02	0.98(0.93-1.03)	0.372
				Inverse variance weighted	0.24	0.09	1.28(1.06-1.53)	0.009	0.085							Inverse variance weighted	-0.01	0.02	0.99(0.95-1.03)	0.666
				Weighted mode	0.22	0.19	1.24(0.84-1.84)	0.276	0.926							Weighted mode	-0.02	0.03	0.98(0.92-1.04)	0.521
order	Bacteroidales	T1D	13	MR Egger	-0.11	0.26	0.90(0.54-1.50)	0.682	0.864	6.528	0.887	0.025	0.017	0.176	19	MR Egger	-0.05	0.05	0.95(0.86-1.06)	0.355
				Weighted median	0.22	0.12	1.25(0.98-1.59)	0.067	0.488							Weighted median	-0.02	0.03	0.98(0.93-1.03)	0.39
				Inverse variance weighted	0.24	0.09	1.28(1.06-1.53)	0.009	0.085							Inverse variance weighted	-0.01	0.02	0.99(0.95-1.03)	0.666
				Weighted mode	0.22	0.2	1.24(0.85-1.82)	0.302	0.926							Weighted mode	-0.02	0.03	0.98(0.92-1.04)	0.53
family	Bacteroidaceae	T1D	9	MR Egger	0.04	0.52	1.04(0.37-2.90)	0.941	0.941
				Weighted median	0.02	0.13	1.02(0.78-1.33)	0.893	0.909
				Inverse variance weighted	0.03	0.1	1.03(0.84-1.26)	0.762	0.859
				Weighted mode	-0.02	0.22	0.98(0.65-1.49)	0.944	0.985
family	Bacteroidales S24 7group	T1D	8	MR Egger	-0.24	0.38	0.79(0.37-1.67)	0.556	0.864
				Weighted median	0.06	0.1	1.06(0.87-1.29)	0.546	0.909
				Inverse variance weighted	0.1	0.09	1.10(0.91-1.32)	0.31	0.859
				Weighted mode	0.06	0.13	1.07(0.81-1.41)	0.632	0.926
family	Porphyromonadaceae	T1D	8	MR Egger	0.94	1.35	2.57(0.18-36.23)	0.511	0.864
				Weighted median	-0.02	0.18	0.98(0.70-1.38)	0.909	0.909
				Inverse variance weighted	-0.05	0.18	0.95(0.67-1.34)	0.769	0.859
				Weighted mode	0.31	0.35	1.37(0.64-2.89)	0.407	0.926
family	Prevotellaceae	T1D	15	MR Egger	-0.64	0.26	0.53(0.31-0.88)	0.029	0.275	18.4	0.189	0.044	0.018	0.032
				Weighted median	-0.07	0.11	0.93(0.76-1.15)	0.546	0.909
				Inverse variance weighted	-0.04	0.08	0.96(0.82-1.14)	0.654	0.859
				Weighted mode	-0.01	0.18	0.99(0.68-1.45)	0.968	0.985
family	Rikenellaceae	T1D	16	MR Egger	0.67	0.23	1.95(1.23-3.08)	0.013	0.247	20.157	0.166	-0.045	0.017	0.016
				Weighted median	-0.02	0.11	0.98(0.78-1.24)	0.884	0.909
				Inverse variance weighted	0.07	0.09	1.07(0.90-1.27)	0.458	0.859
				Weighted mode	-0.10	0.24	0.91(0.59-1.40)	0.682	0.926
genus	Alistipes	T1D	12	MR Egger	-0.80	0.47	0.45(0.18-1.13)	0.121	0.766
				Weighted median	0.1	0.14	1.10(0.84-1.45)	0.48	0.909
				Inverse variance weighted	0.06	0.1	1.06(0.88-1.29)	0.523	0.859
				Weighted mode	-0.15	0.25	0.86(0.52-1.41)	0.559	0.926
genus	Alloprevotella	T1D	6	MR Egger	0.24	0.52	1.27(0.46-3.48)	0.67	0.864
				Weighted median	0.03	0.07	1.03(0.91-1.17)	0.643	0.909
				Inverse variance weighted	0.04	0.05	1.04(0.94-1.16)	0.45	0.859
				Weighted mode	0	0.1	1.00(0.84-1.20)	0.985	0.985
genus	Bacteroides	T1D	9	MR Egger	0.04	0.52	1.02(0.78-1.33)	0.941	0.941
				Weighted median	0.02	0.13	1.03(0.84-1.26)	0.893	0.909
				Inverse variance weighted	0.03	0.1	0.98(0.65-1.50)	0.762	0.859
				Weighted mode	-0.02	0.2	1.08(0.69-1.70)	0.94	0.985
genus	Barnesiella	T1D	10	MR Egger	0.12	0.4	1.13(0.51-2.47)	0.773	0.864
				Weighted median	0.06	0.11	1.07(0.85-1.34)	0.569	0.909
				Inverse variance weighted	0.09	0.09	1.10(0.92-1.30)	0.294	0.859
				Weighted mode	0.08	0.17	1.08(0.78-1.51)	0.639	0.926
genus	Butyricimonas	T1D	13	MR Egger	-0.17	0.4	0.84(0.38-1.85)	0.676	0.864
				Weighted median	-0.02	0.12	0.98(0.78-1.23)	0.845	0.909
				Inverse variance weighted	-0.00	0.11	1.00(0.81-1.24)	0.987	0.987
				Weighted mode	-0.06	0.21	0.95(0.62-1.44)	0.8	0.985
genus	Coprobacter	T1D	10	MR Egger	0.18	0.3	1.20(0.66-2.15)	0.567	0.864
				Weighted median	-0.05	0.09	0.96(0.80-1.13)	0.602	0.909
				Inverse variance weighted	-0.01	0.08	0.99(0.85-1.15)	0.86	0.908
				Weighted mode	-0.09	0.14	0.92(0.70-1.20)	0.538	0.926
genus	Odoribacter	T1D	6	MR Egger	-0.19	0.55	0.83(0.28-2.43)	0.748	0.864
				Weighted median	0.27	0.15	1.31(0.97-1.76)	0.077	0.488
				Inverse variance weighted	0.15	0.14	1.16(0.88-1.52)	0.285	0.859
				Weighted mode	0.33	0.21	1.39(0.92-2.12)	0.179	0.926
genus	Parabacteroides	T1D	5	MR Egger	0.32	0.82	1.37(0.27-6.86)	0.726	0.864
				Weighted median	0.09	0.16	1.10(0.81-1.49)	0.553	0.909
				Inverse variance weighted	0.07	0.13	1.07(0.83-1.39)	0.593	0.859
				Weighted mode	0.2	0.22	1.22(0.77-1.93)	0.44	0.926
genus	Paraprevotella	T1D	12	MR Egger	-0.09	0.26	0.91(0.55-1.51)	0.721	0.864
				Weighted median	0.04	0.08	1.04(0.89-1.21)	0.648	0.909
				Inverse variance weighted	-0.02	0.07	0.98(0.86-1.11)	0.711	0.859
				Weighted mode	0.07	0.14	1.07(0.82-1.40)	0.628	0.926
genus	Prevotella7	T1D	11	MR Egger	-0.18	0.36	0.83(0.41-1.68)	0.618	0.864
				Weighted median	-0.05	0.06	0.95(0.84-1.07)	0.415	0.909
				Inverse variance weighted	0.02	0.06	1.02(0.91-1.15)	0.696	0.859
				Weighted mode	-0.06	0.1	0.94(0.78-1.14)	0.552	0.926
genus	Prevotella9	T1D	15	MR Egger	0.05	0.17	1.05(0.76-1.46)	0.771	0.864
				Weighted median	-0.03	0.08	0.97(0.84-1.13)	0.735	0.909
				Inverse variance weighted	-0.04	0.06	0.96(0.86-1.07)	0.459	0.859
				Weighted mode	0.05	0.12	1.05(0.83-1.33)	0.68	0.926
genus	Rikenellaceae RC9 gut group	T1D	11	MR Egger	0.3	0.26	1.36(0.81-2.28)	0.28	0.864
				Weighted median	0.01	0.06	1.01(0.90-1.14)	0.805	0.909
				Inverse variance weighted	0.03	0.04	1.03(0.95-1.12)	0.499	0.859
				Weighted mode	0.08	0.1	1.08(0.89-1.32)	0.451	0.926
Note: Nsnp, the number of snps involved; MR analysis, Mendelian randomization analysis. In the MR analysis, gut microbiota was treated as the exposure, T1D was treated as the outcome. In the reverse MR analysis, T1D was treated as the exposure, gut microbiota was treated as the outcome.

## Sheet: Supplementary table 4
Supplementary table 4. Mendelian randomization analysis results between Firmicutes and T1D
Taxa	Gut microbiota	Trait	MR analysis												Reverse MR analysis
			Nsnp	Methods	Beta	SE	OR (95%CI)	P value	PFDR	Heterogeneity		Horizontal pleiotropy			Nsnp	Methods	Beta	SE	OR (95%CI)	P value	Heterogeneity		Horizontal pleiotropy
										Cochran’s Q	P value	Egger intercept	SE	P value							Cochran’s Q	P value	Egger intercept	SE	P value
phylum	Firmicutes	T1D	14	MR Egger	0.01	0.21	1.01(0.67-1.52)	0.963	0.963							MR Egger
				Weighted median	0.04	0.11	1.04(0.84-1.29)	0.694	0.694							Weighted median
				Inverse variance weighted	-0.07	0.08	0.93(0.80-1.09)	0.362	0.362							Inverse variance weighted
				Weighted mode	0.06	0.15	1.06(0.78-1.46)	0.691	0.691							Weighted mode
class	Bacilli	T1D	18	MR Egger	0.17	0.24	1.19(0.75-1.89)	0.473	0.972							MR Egger
				Weighted median	0.01	0.11	1.01(0.83-1.22)	0.942	0.978							Weighted median
				Inverse variance weighted	-0.03	0.08	0.97(0.82-1.15)	0.743	0.986							Inverse variance weighted
				Weighted mode	0.04	0.14	1.04(0.78-1.39)	0.773	0.953							Weighted mode
class	Clostridia	T1D	10	MR Egger	-0.38	0.41	0.68(0.30-1.54)	0.385	0.972	7.819	0.552	0.013	0.027	0.65	19	MR Egger	0.08	0.06	1.09(0.96-1.23)	0.205
				Weighted median	-0.23	0.13	0.79(0.61-1.03)	0.081	0.856							Weighted median	0.04	0.03	1.04(0.98-1.10)	0.189
				Inverse variance weighted	-0.19	0.1	0.83(0.68-1.00)	0.049	0.588							Inverse variance weighted	0.02	0.02	1.02(0.97-1.07)	0.407
				Weighted mode	-0.22	0.2	0.80(0.54-1.18)	0.285	0.953							Weighted mode	0.05	0.04	1.05(0.97-1.14)	0.229
class	Erysipelotrichia	T1D	13	MR Egger	-0.19	0.55	0.83(0.28-2.46)	0.744	0.988							MR Egger
				Weighted median	-0.12	0.13	0.89(0.68-1.16)	0.378	0.858							Weighted median
				Inverse variance weighted	-0.13	0.12	0.87(0.69-1.11)	0.274	0.822							Inverse variance weighted
				Weighted mode	-0.09	0.2	0.91(0.62-1.34)	0.647	0.953							Weighted mode
class	Negativicutes	T1D	12	MR Egger	-0.03	0.43	0.97(0.42-2.23)	0.939	0.988							MR Egger
				Weighted median	-0.09	0.14	0.91(0.70-1.19)	0.512	0.889							Weighted median
				Inverse variance weighted	-0.04	0.12	0.96(0.76-1.21)	0.713	0.986							Inverse variance weighted
				Weighted mode	-0.13	0.27	0.87(0.50-1.52)	0.626	0.953							Weighted mode
order	Bacillales	T1D	9	MR Egger	-0.32	0.19	0.72(0.50-1.04)	0.124	0.972							MR Egger
				Weighted median	-0.03	0.06	0.97(0.87-1.09)	0.654	0.896							Weighted median
				Inverse variance weighted	0.03	0.04	1.03(0.94-1.12)	0.52	0.978							Inverse variance weighted
				Weighted mode	-0.04	0.08	0.96(0.80-1.15)	0.61	0.953							Weighted mode
order	Clostridiales	T1D	11	MR Egger	-0.37	0.39	0.69(0.32-1.49)	0.366	0.972							MR Egger
				Weighted median	-0.15	0.12	0.86(0.67-1.10)	0.213	0.858							Weighted median
				Inverse variance weighted	-0.16	0.09	0.85(0.71-1.03)	0.097	0.69							Inverse variance weighted
				Weighted mode	-0.18	0.18	0.83(0.58-1.20)	0.326	0.953							Weighted mode
order	Erysipelotrichales	T1D	13	MR Egger	-0.19	0.55	0.83(0.28-2.46)	0.744	0.988							MR Egger
				Weighted median	-0.12	0.14	0.89(0.69-1.15)	0.387	0.858							Weighted median
				Inverse variance weighted	-0.13	0.12	0.87(0.69-1.11)	0.274	0.822							Inverse variance weighted
				Weighted mode	-0.09	0.19	0.91(0.61-1.37)	0.638	0.953							Weighted mode
order	Lactobacillales	T1D	14	MR Egger	0.15	0.28	1.16(0.68-2.01)	0.594	0.988							MR Egger
				Weighted median	-0.01	0.12	0.99(0.78-1.24)	0.909	0.978							Weighted median
				Inverse variance weighted	-0.06	0.11	0.94(0.76-1.16)	0.574	0.978							Inverse variance weighted
				Weighted mode	0.03	0.15	1.03(0.76-1.39)	0.839	0.965							Weighted mode
order	Selenomonadales	T1D	12	MR Egger	-0.03	0.43	0.97(0.42-2.23)	0.939	0.988							MR Egger
				Weighted median	-0.09	0.14	0.91(0.70-1.18)	0.492	0.889							Weighted median
				Inverse variance weighted	-0.04	0.12	0.96(0.76-1.21)	0.713	0.986							Inverse variance weighted
				Weighted mode	-0.13	0.3	0.87(0.50-1.52)	0.661	0.953							Weighted mode
family	Acidaminococcaceae	T1D	7	MR Egger	-0.06	0.27	0.95(0.56-1.60)	0.844	0.988							MR Egger
				Weighted median	-0.12	0.12	0.89(0.71-1.11)	0.316	0.858							Weighted median
				Inverse variance weighted	-0.06	0.09	0.94(0.79-1.12)	0.477	0.978							Inverse variance weighted
				Weighted mode	-0.15	0.16	0.86(0.63-1.17)	0.377	0.953							Weighted mode
family	Christensenellaceae	T1D	12	MR Egger	-0.02	0.16	0.98(0.72-1.34)	0.899	0.988							MR Egger
				Weighted median	0.12	0.11	1.13(0.93-1.38)	0.245	0.858							Weighted median
				Inverse variance weighted	0.04	0.08	1.04(0.89-1.22)	0.582	0.978							Inverse variance weighted
				Weighted mode	0.24	0.18	1.28(0.87-1.87)	0.205	0.953							Weighted mode
family	Clostridiaceae1	T1D	10	MR Egger	-0.26	0.25	0.77(0.47-1.27)	0.331	0.972							MR Egger
				Weighted median	-0.05	0.11	0.96(0.77-1.19)	0.671	0.896							Weighted median
				Inverse variance weighted	0.01	0.09	1.01(0.85-1.20)	0.916	0.986							Inverse variance weighted
				Weighted mode	-0.08	0.16	0.93(0.68-1.25)	0.637	0.953							Weighted mode
family	Clostridiales vadin BB60 group	T1D	14	MR Egger	-0.26	0.27	0.77(0.45-1.32)	0.358	0.972							MR Egger
				Weighted median	-0.14	0.1	0.87(0.72-1.04)	0.137	0.858							Weighted median
				Inverse variance weighted	-0.01	0.08	0.99(0.85-1.16)	0.912	0.986							Inverse variance weighted
				Weighted mode	-0.21	0.18	0.81(0.59-1.11)	0.257	0.953							Weighted mode
family	Defluviitaleaceae	T1D	11	MR Egger	0.23	0.24	1.26(0.78-2.02)	0.366	0.972							MR Egger
				Weighted median	-0.11	0.1	0.90(0.75-1.08)	0.257	0.858							Weighted median
				Inverse variance weighted	-0.07	0.07	0.94(0.81-1.08)	0.368	0.924							Inverse variance weighted
				Weighted mode	-0.23	0.16	0.79(0.57-1.10)	0.189	0.953							Weighted mode
family	Erysipelotrichaceae	T1D	13	MR Egger	-0.19	0.55	0.83(0.28-2.46)	0.744	0.988							MR Egger
				Weighted median	-0.12	0.13	0.89(0.68-1.16)	0.381	0.858							Weighted median
				Inverse variance weighted	-0.13	0.12	0.87(0.69-1.11)	0.274	0.822							Inverse variance weighted
				Weighted mode	-0.09	0.18	0.91(0.63-1.33)	0.624	0.953							Weighted mode
family	Family XI	T1D	8	MR Egger	0.35	0.3	1.42(0.79-2.55)	0.283	0.972	8.439	0.295	-0.066	0.039	0.147	13	MR Egger	-0.04	0.19	0.96(0.66-1.39)	0.845
				Weighted median	-0.19	0.07	0.82(0.71-0.95)	0.004	0.302							Weighted median	0	0.07	1.00(0.86-1.16)	0.983
				Inverse variance weighted	-0.14	0.05	0.87(0.79-0.96)	0.007	0.378							Inverse variance weighted	-0.03	0.05	0.97(0.87-1.08)	0.545
				Weighted mode	-0.25	0.14	0.78(0.60-1.02)	0.111	0.953							Weighted mode	-0.00	0.09	1.00(0.84-1.19)	0.974
family	Family XIII	T1D	7	MR Egger	-0.53	0.45	0.59(0.24-1.42)	0.29	0.972							MR Egger
				Weighted median	-0.08	0.16	0.93(0.67-1.28)	0.624	0.896							Weighted median
				Inverse variance weighted	-0.04	0.12	0.96(0.76-1.22)	0.747	0.986							Inverse variance weighted
				Weighted mode	-0.22	0.25	0.80(0.49-1.30)	0.399	0.953							Weighted mode
family	Lactobacillaceae	T1D	8	MR Egger	-0.01	0.16	0.99(0.73-1.35)	0.955	0.988							MR Egger
				Weighted median	-0.01	0.09	0.99(0.84-1.16)	0.866	0.978							Weighted median
				Inverse variance weighted	-0.00	0.06	1.00(0.88-1.13)	0.967	0.986							Inverse variance weighted
				Weighted mode	-0.03	0.1	0.97(0.81-1.17)	0.793	0.953							Weighted mode
family	Peptococcaceae	T1D	8	MR Egger	-0.14	0.29	0.87(0.50-1.52)	0.634	0.988	9.908	0.194	-0.005	0.025	0.835	19	MR Egger	-0.07	0.06	0.93(0.82-1.05)	0.278
				Weighted median	-0.19	0.11	0.83(0.66-1.04)	0.102	0.856							Weighted median	-0.02	0.03	0.98(0.92-1.04)	0.451
				Inverse variance weighted	-0.20	0.09	0.82(0.68-0.98)	0.034	0.588							Inverse variance weighted	0	0.02	1.00(0.96-1.05)	0.881
				Weighted mode	-0.22	0.17	0.80(0.58-1.11)	0.222	0.953							Weighted mode	-0.03	0.04	0.97(0.91-1.05)	0.501
family	Peptostreptococcaceae	T1D	12	MR Egger	0.1	0.16	1.11(0.80-1.53)	0.542	0.988							MR Egger
				Weighted median	0.15	0.1	1.17(0.95-1.43)	0.13	0.858							Weighted median
				Inverse variance weighted	0.1	0.07	1.10(0.95-1.27)	0.189	0.822							Inverse variance weighted
				Weighted mode	0.17	0.14	1.18(0.92-1.53)	0.247	0.953							Weighted mode
family	Ruminococcaceae	T1D	9	MR Egger	0.06	0.21	1.06(0.71-1.59)	0.778	0.988							MR Egger
				Weighted median	-0.08	0.11	0.93(0.74-1.16)	0.493	0.889							Weighted median
				Inverse variance weighted	-0.07	0.09	0.93(0.78-1.12)	0.457	0.978							Inverse variance weighted
				Weighted mode	-0.11	0.16	0.90(0.67-1.21)	0.523	0.953							Weighted mode
family	Streptococcaceae	T1D	11	MR Egger	-0.18	0.4	0.83(0.38-1.83)	0.66	0.988							MR Egger
				Weighted median	0.05	0.13	1.05(0.82-1.34)	0.723	0.896							Weighted median
				Inverse variance weighted	-0.03	0.1	0.97(0.79-1.19)	0.763	0.986							Inverse variance weighted
				Weighted mode	0.23	0.23	1.26(0.80-1.99)	0.341	0.953							Weighted mode
family	Veillonellaceae	T1D	19	MR Egger	-0.01	0.12	0.99(0.78-1.26)	0.923	0.988	16.211	0.578	0.013	0.01	0.187	19	MR Egger	0.07	0.06	1.08(0.97-1.20)	0.202
				Weighted median	0.08	0.09	1.09(0.91-1.30)	0.36	0.858							Weighted median	0.02	0.03	1.02(0.97-1.08)	0.38
				Inverse variance weighted	0.13	0.06	1.14(1.02-1.29)	0.027	0.588							Inverse variance weighted	0.01	0.02	1.01(0.97-1.06)	0.521
				Weighted mode	0	0.13	1.00(0.79-1.28)	0.98	0.998							Weighted mode	0.02	0.03	1.02(0.95-1.09)	0.575
genus	Allisonella	T1D	7	MR Egger	0.74	0.34	2.09(1.07-4.10)	0.083	0.972							MR Egger
				Weighted median	0.09	0.07	1.09(0.96-1.24)	0.194	0.858							Weighted median
				Inverse variance weighted	0.03	0.05	1.03(0.93-1.15)	0.55	0.978							Inverse variance weighted
				Weighted mode	0.09	0.08	1.09(0.94-1.27)	0.3	0.953							Weighted mode
genus	Anaerofilum	T1D	11	MR Egger	-0.32	0.28	0.72(0.41-1.27)	0.287	0.972							MR Egger
				Weighted median	-0.06	0.07	0.94(0.82-1.08)	0.356	0.858							Weighted median
				Inverse variance weighted	-0.02	0.05	0.98(0.88-1.08)	0.683	0.978							Inverse variance weighted
				Weighted mode	-0.06	0.1	0.95(0.78-1.15)	0.585	0.953							Weighted mode
genus	Anaerostipes	T1D	13	MR Egger	-0.06	0.35	0.94(0.47-1.89)	0.868	0.988							MR Egger
				Weighted median	0.03	0.12	1.03(0.81-1.31)	0.822	0.944							Weighted median
				Inverse variance weighted	-0.04	0.09	0.96(0.80-1.15)	0.656	0.978							Inverse variance weighted
				Weighted mode	0.1	0.19	1.11(0.76-1.62)	0.605	0.953							Weighted mode
genus	Anaerotruncus	T1D	12	MR Egger	-0.11	0.4	0.90(0.41-1.97)	0.797	0.988							MR Egger
				Weighted median	-0.09	0.13	0.92(0.71-1.18)	0.502	0.889							Weighted median
				Inverse variance weighted	-0.10	0.11	0.90(0.73-1.11)	0.339	0.872							Inverse variance weighted
				Weighted mode	-0.07	0.21	1.04(0.37-2.90)	0.729	0.953							Weighted mode
genus	Blautia	T1D	12	MR Egger	-0.23	0.27	0.79(0.46-1.35)	0.415	0.972							MR Egger
				Weighted median	-0.12	0.13	0.89(0.70-1.14)	0.369	0.858							Weighted median
				Inverse variance weighted	0.02	0.11	1.02(0.83-1.26)	0.829	0.986							Inverse variance weighted
				Weighted mode	-0.13	0.18	0.88(0.61-1.26)	0.475	0.953							Weighted mode
genus	Butyricicoccus	T1D	8	MR Egger	0.15	0.23	1.16(0.74-1.82)	0.552	0.988	9.059	0.248	0.008	0.02	0.705	19	MR Egger	0	0.05	1.00(0.91-1.11)	0.974
				Weighted median	0.12	0.14	1.12(0.86-1.47)	0.397	0.858							Weighted median	0	0.03	1.00(0.95-1.06)	0.881
				Inverse variance weighted	0.22	0.11	1.25(1.01-1.55)	0.041	0.588							Inverse variance weighted	-0.00	0.02	1.00(0.96-1.04)	0.988
				Weighted mode	0.11	0.15	1.11(0.83-1.48)	0.492	0.953							Weighted mode	0.02	0.04	1.02(0.95-1.10)	0.547
genus	Butyrivibrio	T1D	15	MR Egger	0.2	0.15	1.22(0.90-1.65)	0.215	0.972							MR Egger
				Weighted median	0.03	0.05	1.03(0.93-1.13)	0.593	0.896							Weighted median
				Inverse variance weighted	-0.00	0.04	1.00(0.93-1.07)	0.976	0.986							Inverse variance weighted
				Weighted mode	0.05	0.09	1.05(0.88-1.25)	0.613	0.953							Weighted mode
genus	Candidatus Soleaferrea	T1D	10	MR Egger	-0.18	0.67	0.84(0.23-3.09)	0.795	0.988							MR Egger
				Weighted median	0.03	0.08	1.03(0.88-1.21)	0.677	0.896							Weighted median
				Inverse variance weighted	0.03	0.06	1.03(0.92-1.16)	0.57	0.978							Inverse variance weighted
				Weighted mode	0.04	0.14	1.04(0.77-1.40)	0.794	0.953							Weighted mode
genus	Catenibacterium	T1D	5	MR Egger	1.61	0.95	5.02(0.77-32.62)	0.19	0.972							MR Egger
				Weighted median	0.16	0.09	1.17(0.98-1.39)	0.086	0.856							Weighted median
				Inverse variance weighted	0.15	0.09	1.16(0.97-1.38)	0.1	0.69							Inverse variance weighted
				Weighted mode	0.23	0.15	1.25(0.92-1.72)	0.206	0.953							Weighted mode
genus	Christensenellaceae R 7group	T1D	10	MR Egger	-0.30	0.32	0.74(0.40-1.38)	0.375	0.972							MR Egger
				Weighted median	0.01	0.14	1.01(0.78-1.31)	0.938	0.978							Weighted median
				Inverse variance weighted	0	0.1	1.00(0.82-1.22)	0.975	0.986							Inverse variance weighted
				Weighted mode	0.06	0.2	1.06(0.75-1.51)	0.77	0.953							Weighted mode
genus	Clostridium innocuum group	T1D	9	MR Egger	-0.34	0.28	0.71(0.41-1.22)	0.255	0.972							MR Egger
				Weighted median	-0.02	0.07	0.98(0.85-1.13)	0.779	0.905							Weighted median
				Inverse variance weighted	0	0.06	1.00(0.89-1.13)	0.97	0.986							Inverse variance weighted
				Weighted mode	-0.05	0.11	0.95(0.76-1.19)	0.676	0.953							Weighted mode
genus	Clostridium sensustricto1	T1D	7	MR Egger	-0.03	0.23	0.97(0.61-1.54)	0.904	0.988							MR Egger
				Weighted median	-0.07	0.11	0.93(0.74-1.16)	0.527	0.889							Weighted median
				Inverse variance weighted	-0.04	0.09	0.96(0.80-1.15)	0.651	0.978							Inverse variance weighted
				Weighted mode	-0.09	0.16	0.92(0.67-1.26)	0.614	0.953							Weighted mode
genus	Coprococcus1	T1D	12	MR Egger	0.12	0.28	1.13(0.65-1.94)	0.677	0.988							MR Egger
				Weighted median	-0.07	0.12	0.94(0.74-1.18)	0.587	0.896							Weighted median
				Inverse variance weighted	0.01	0.11	1.01(0.82-1.24)	0.954	0.986							Inverse variance weighted
				Weighted mode	-0.17	0.17	0.84(0.60-1.19)	0.334	0.953							Weighted mode
genus	Coprococcus2	T1D	8	MR Egger	-1.27	0.96	0.28(0.04-1.83)	0.232	0.972							MR Egger
				Weighted median	-0.24	0.13	0.79(0.61-1.01)	0.064	0.856							Weighted median
				Inverse variance weighted	-0.18	0.12	0.83(0.65-1.06)	0.146	0.722							Inverse variance weighted
				Weighted mode	-0.30	0.17	0.74(0.53-1.04)	0.126	0.953							Weighted mode
genus	Coprococcus3	T1D	9	MR Egger	-0.12	0.65	0.88(0.25-3.17)	0.856	0.988							MR Egger
				Weighted median	-0.14	0.14	0.87(0.66-1.16)	0.341	0.858							Weighted median
				Inverse variance weighted	-0.05	0.11	0.95(0.77-1.18)	0.655	0.978							Inverse variance weighted
				Weighted mode	-0.22	0.22	0.80(0.52-1.25)	0.359	0.953							Weighted mode
genus	Defluviitaleaceae	T1D	9	MR Egger	0.05	0.36	1.05(0.51-2.14)	0.899	0.988							MR Egger
				Weighted median	0.01	0.11	1.01(0.82-1.25)	0.905	0.978							Weighted median
				Inverse variance weighted	0	0.09	1.00(0.83-1.21)	0.961	0.986							Inverse variance weighted
				Weighted mode	0.05	0.16	1.05(0.76-1.44)	0.778	0.953							Weighted mode
genus	Dialister	T1D	11	MR Egger	0.24	0.45	1.27(0.52-3.10)	0.611	0.988							MR Egger
				Weighted median	0.17	0.12	1.18(0.94-1.49)	0.159	0.858							Weighted median
				Inverse variance weighted	0.08	0.11	1.08(0.88-1.33)	0.464	0.978							Inverse variance weighted
				Weighted mode	0.21	0.16	1.23(0.90-1.67)	0.215	0.953							Weighted mode
genus	Dorea	T1D	10	MR Egger	-0.38	0.3	0.69(0.38-1.24)	0.251	0.972	9.558	0.387	0.012	0.02	0.569	19	MR Egger	0.06	0.05	1.07(0.96-1.19)	0.249
				Weighted median	-0.34	0.15	0.71(0.53-0.95)	0.02	0.54							Weighted median	0.01	0.03	1.01(0.96-1.06)	0.695
				Inverse variance weighted	-0.21	0.1	0.81(0.66-1.00)	0.048	0.588							Inverse variance weighted	-0.00	0.02	1.00(0.96-1.04)	0.836
				Weighted mode	-0.44	0.25	0.64(0.39-1.05)	0.11	0.953							Weighted mode	0.03	0.03	1.03(0.97-1.10)	0.307
genus	Eisenbergiella	T1D	11	MR Egger	-0.00	0.51	1.00(0.36-2.73)	0.994	0.994							MR Egger
				Weighted median	0.03	0.08	1.03(0.88-1.20)	0.69	0.896							Weighted median
				Inverse variance weighted	0.05	0.07	1.05(0.92-1.19)	0.469	0.978							Inverse variance weighted
				Weighted mode	0.02	0.13	1.02(0.78-1.32)	0.895	0.965							Weighted mode
genus	Erysipelatoclostridium	T1D	15	MR Egger	-0.44	0.25	0.65(0.40-1.05)	0.101	0.972							MR Egger
				Weighted median	-0.03	0.08	0.97(0.82-1.14)	0.728	0.896							Weighted median
				Inverse variance weighted	-0.03	0.07	0.97(0.85-1.11)	0.663	0.978							Inverse variance weighted
				Weighted mode	-0.01	0.13	0.99(0.76-1.28)	0.936	0.965							Weighted mode
genus	Erysipelotrichaceae UCG003	T1D	15	MR Egger	-0.13	0.19	0.87(0.60-1.28)	0.499	0.972							MR Egger
				Weighted median	-0.00	0.1	1.00(0.83-1.20)	0.975	0.978							Weighted median
				Inverse variance weighted	0.02	0.07	1.02(0.89-1.17)	0.805	0.986							Inverse variance weighted
				Weighted mode	-0.03	0.16	0.97(0.71-1.34)	0.871	0.965							Weighted mode
genus	Eubacterium brachy	T1D	10	MR Egger	0.05	0.2	1.05(0.70-1.57)	0.813	0.988							MR Egger
				Weighted median	-0.02	0.06	0.98(0.86-1.11)	0.754	0.896							Weighted median
				Inverse variance weighted	-0.01	0.05	0.99(0.90-1.09)	0.852	0.986							Inverse variance weighted
				Weighted mode	-0.01	0.1	0.99(0.80-1.21)	0.906	0.965							Weighted mode
genus	Eubacterium coprostanoligenes group	T1D	11	MR Egger	0.09	0.36	1.09(0.54-2.20)	0.807	0.988							MR Egger
				Weighted median	-0.07	0.13	0.93(0.72-1.19)	0.559	0.896							Weighted median
				Inverse variance weighted	-0.11	0.1	0.90(0.74-1.09)	0.272	0.822							Inverse variance weighted
				Weighted mode	-0.07	0.19	0.94(0.64-1.37)	0.739	0.953							Weighted mode
genus	Eubacterium eligens group	T1D	6	MR Egger	-0.63	0.51	0.53(0.20-1.44)	0.282	0.972	5.572	0.35	0.015	0.04	0.728	19	MR Egger	-0.14	0.07	0.87(0.76-1.01)	0.077
				Weighted median	-0.44	0.16	0.64(0.47-0.88)	0.00559	0.302							Weighted median	-0.03	0.03	0.97(0.92-1.03)	0.325
				Inverse variance weighted	-0.45	0.12	0.64(0.50-0.81)	0.0002841	0.031							Inverse variance weighted	-0.00	0.03	1.00(0.94-1.06)	0.942
				Weighted mode	-0.56	0.27	0.57(0.34-0.97)	0.093	0.953							Weighted mode	-0.05	0.03	0.95(0.89-1.01)	0.14
genus	Eubacterium fissicatena group	T1D	7	MR Egger	-0.09	0.33	0.92(0.48-1.73)	0.797	0.988							MR Egger
				Weighted median	0.08	0.08	1.09(0.92-1.28)	0.312	0.858							Weighted median
				Inverse variance weighted	0	0.06	1.00(0.89-1.13)	0.941	0.986							Inverse variance weighted
				Weighted mode	0.11	0.13	1.12(0.86-1.44)	0.441	0.953							Weighted mode
genus	Eubacterium hallii group	T1D	15	MR Egger	-0.17	0.145	0.84(0.63-1.12)	0.256	0.972							MR Egger
				Weighted median	-0.05	0.091	0.95(0.79-1.14)	0.576	0.896							Weighted median
				Inverse variance weighted	0.04	0.074	1.04(0.90-1.20)	0.626	0.978							Inverse variance weighted
				Weighted mode	-0.06	0.114	0.94(0.75-1.18)	0.593	0.953							Weighted mode
genus	Eubacterium nodatum group	T1D	11	MR Egger	-0.15	0.21	0.86(0.57-1.31)	0.504	0.972							MR Egger
				Weighted median	0.08	0.06	1.09(0.96-1.23)	0.168	0.858							Weighted median
				Inverse variance weighted	0.09	0.05	1.09(0.99-1.20)	0.075	0.64							Inverse variance weighted
				Weighted mode	0.07	0.09	1.07(0.89-1.28)	0.483	0.953							Weighted mode
genus	Eubacterium oxidoreducens group	T1D	5	MR Egger	0.55	0.29	1.73(0.98-3.05)	0.155	0.972							MR Egger
				Weighted median	0.04	0.11	1.04(0.84-1.28)	0.745	0.896							Weighted median
				Inverse variance weighted	0.04	0.09	1.04(0.87-1.24)	0.688	0.978							Inverse variance weighted
				Weighted mode	0.04	0.14	1.05(0.79-1.38)	0.768	0.953							Weighted mode
genus	Eubacterium rectale group	T1D	8	MR Egger	0.19	0.39	1.21(0.56-2.61)	0.652	0.988							MR Egger
				Weighted median	-0.01	0.13	0.99(0.77-1.28)	0.942	0.978							Weighted median
				Inverse variance weighted	0.02	0.11	1.02(0.82-1.26)	0.874	0.986							Inverse variance weighted
				Weighted mode	-0.07	0.18	0.93(0.65-1.33)	0.718	0.953							Weighted mode
genus	Eubacterium ruminantium group	T1D	18	MR Egger	0.11	0.2	1.11(0.76-1.64)	0.6	0.988							MR Egger
				Weighted median	0.01	0.07	1.01(0.87-1.16)	0.93	0.978							Weighted median
				Inverse variance weighted	-0.00	0.06	1.00(0.89-1.12)	0.97	0.986							Inverse variance weighted
				Weighted mode	0.06	0.12	1.06(0.84-1.36)	0.62	0.953							Weighted mode
genus	Eubacterium ventriosum group	T1D	16	MR Egger	0.02	0.31	1.02(0.55-1.88)	0.952	0.988							MR Egger
				Weighted median	-0.05	0.1	0.95(0.78-1.15)	0.611	0.896							Weighted median
				Inverse variance weighted	-0.13	0.07	0.88(0.76-1.01)	0.075	0.64							Inverse variance weighted
				Weighted mode	-0.03	0.17	0.97(0.70-1.36)	0.88	0.965							Weighted mode
genus	Eubacterium xylanophilum group	T1D	9	MR Egger	0.13	0.25	1.14(0.70-1.86)	0.621	0.988							MR Egger
				Weighted median	0.09	0.11	1.09(0.88-1.35)	0.415	0.87							Weighted median
				Inverse variance weighted	0.13	0.08	1.14(0.97-1.35)	0.11	0.69							Inverse variance weighted
				Weighted mode	0.09	0.15	1.10(0.82-1.48)	0.55	0.953							Weighted mode
genus	Faecalibacterium	T1D	10	MR Egger	-0.24	0.18	0.79(0.55-1.13)	0.228	0.972							MR Egger
				Weighted median	-0.14	0.12	0.87(0.70-1.10)	0.242	0.858							Weighted median
				Inverse variance weighted	-0.10	0.09	0.91(0.76-1.09)	0.307	0.835							Inverse variance weighted
				Weighted mode	-0.21	0.14	0.81(0.62-1.06)	0.162	0.953							Weighted mode
genus	Family XIII AD3011 group	T1D	12	MR Egger	-0.21	0.45	0.81(0.34-1.94)	0.642	0.988							MR Egger
				Weighted median	-0.05	0.12	0.95(0.76-1.20)	0.695	0.896							Weighted median
				Inverse variance weighted	-0.06	0.09	0.94(0.78-1.14)	0.545	0.978							Inverse variance weighted
				Weighted mode	-0.09	0.17	0.91(0.66-1.26)	0.595	0.953							Weighted mode
genus	Family XIII UCG-001	T1D	8	MR Egger	-0.31	0.29	0.73(0.42-1.28)	0.318	0.972							MR Egger
				Weighted median	-0.14	0.12	0.87(0.69-1.10)	0.25	0.858							Weighted median
				Inverse variance weighted	-0.15	0.09	0.86(0.72-1.03)	0.112	0.69							Inverse variance weighted
				Weighted mode	-0.15	0.18	0.86(0.61-1.22)	0.419	0.953							Weighted mode
genus	Pseudoflavonifractor	T1D	5	MR Egger	-0.02	0.43	0.98(0.42-2.28)	0.966	0.988							MR Egger
				Weighted median	0.1	0.13	1.11(0.85-1.44)	0.452	0.889							Weighted median
				Inverse variance weighted	0.05	0.11	1.05(0.85-1.30)	0.643	0.978							Inverse variance weighted
				Weighted mode	0.11	0.18	1.12(0.18-0.57)	0.566	0.953							Weighted mode
genus	Fusicatenibacter	T1D	18	MR Egger	0.14	0.28	1.15(0.66-1.99)	0.631	0.988							MR Egger
				Weighted median	0.06	0.1	1.07(0.87-1.31)	0.538	0.893							Weighted median
				Inverse variance weighted	0.07	0.07	1.08(0.93-1.25)	0.317	0.835							Inverse variance weighted
				Weighted mode	0.03	0.16	1.03(0.75-1.42)	0.857	0.965							Weighted mode
genus	Holdemanella	T1D	11	MR Egger	0.26	0.16	1.30(0.95-1.79)	0.14	0.972							MR Egger
				Weighted median	-0.07	0.08	0.93(0.79-1.10)	0.394	0.858							Weighted median
				Inverse variance weighted	0.01	0.06	1.01(0.90-1.14)	0.853	0.986							Inverse variance weighted
				Weighted mode	-0.15	0.14	0.86(0.66-1.12)	0.291	0.953							Weighted mode
genus	Holdemania	T1D	14	MR Egger	0.4	0.18	1.50(1.05-2.12)	0.044	0.972	16.392	0.229	-0.038	0.017	0.047		MR Egger
				Weighted median	-0.03	0.09	0.97(0.82-1.15)	0.763	0.896							Weighted median
				Inverse variance weighted	0.03	0.07	1.03(0.90-1.18)	0.671	0.978							Inverse variance weighted
				Weighted mode	-0.18	0.19	0.84(0.56-1.26)	0.383	0.953							Weighted mode
genus	Howardella	T1D	8	MR Egger	-0.06	0.28	0.94(0.54-1.64)	0.842	0.988							MR Egger
				Weighted median	0.08	0.07	1.08(0.94-1.25)	0.273	0.858							Weighted median
				Inverse variance weighted	0.04	0.07	1.04(0.91-1.18)	0.596	0.978							Inverse variance weighted
				Weighted mode	0.11	0.11	1.12(0.90-1.39)	0.333	0.953							Weighted mode
genus	Hungatella	T1D	5	MR Egger	0.83	0.61	2.30(0.70-7.57)	0.266	0.972							MR Egger
				Weighted median	0.17	0.1	1.18(0.98-1.43)	0.086	0.856							Weighted median
				Inverse variance weighted	0.14	0.1	1.15(0.94-1.41)	0.177	0.822							Inverse variance weighted
				Weighted mode	0.25	0.16	1.28(0.94-1.75)	0.189	0.953							Weighted mode
genus	Intestinibacter	T1D	14	MR Egger	0.08	0.3	1.08(0.60-1.95)	0.798	0.988							MR Egger
				Weighted median	0.12	0.1	1.12(0.93-1.36)	0.236	0.858							Weighted median
				Inverse variance weighted	0.07	0.08	1.07(0.91-1.26)	0.424	0.978							Inverse variance weighted
				Weighted mode	0.15	0.18	1.16(0.82-1.64)	0.427	0.953							Weighted mode
genus	Intestinimonas	T1D	14	MR Egger	0.02	0.3	1.02(0.56-1.84)	0.953	0.988							MR Egger
				Weighted median	-0.04	0.1	0.96(0.79-1.16)	0.67	0.896							Weighted median
				Inverse variance weighted	0.02	0.08	1.02(0.87-1.19)	0.83	0.986							Inverse variance weighted
				Weighted mode	-0.05	0.13	0.95(0.74-1.22)	0.703	0.953							Weighted mode
genus	Lachnoclostridium	T1D	13	MR Egger	-0.35	0.37	0.70(0.34-1.46)	0.363	0.972							MR Egger
				Weighted median	0.09	0.13	1.10(0.85-1.42)	0.474	0.889							Weighted median
				Inverse variance weighted	0	0.11	1.00(0.81-1.24)	0.997	0.997							Inverse variance weighted
				Weighted mode	0.32	0.24	1.37(0.85-2.21)	0.221	0.953							Weighted mode
genus	Lachnospiraceae FCS020 group	T1D	12	MR Egger	0.28	0.23	1.33(0.85-2.09)	0.246	0.972							MR Egger
				Weighted median	0.14	0.11	1.15(0.93-1.42)	0.205	0.858							Weighted median
				Inverse variance weighted	0.1	0.09	1.11(0.94-1.31)	0.235	0.882							Inverse variance weighted
				Weighted mode	0.15	0.16	1.16(0.85-1.57)	0.367	0.953							Weighted mode
genus	Lachnospiraceae NC2004 group	T1D	9	MR Egger	0.36	0.36	1.44(0.72-2.89)	0.34	0.972							MR Egger
				Weighted median	-0.01	0.09	0.99(0.83-1.18)	0.912	0.978							Weighted median
				Inverse variance weighted	0.06	0.09	1.06(0.90-1.26)	0.496	0.978							Inverse variance weighted
				Weighted mode	-0.07	0.13	0.93(0.73-1.19)	0.597	0.953							Weighted mode
genus	Lachnospiraceae ND3007 group	T1D	3	MR Egger	-0.51	3.02	0.60(0.00-224.69)	0.893	0.988							MR Egger
				Weighted median	0.27	0.23	1.31(0.84-2.04)	0.233	0.858							Weighted median
				Inverse variance weighted	0.32	0.18	1.37(0.97-1.95)	0.077	0.64							Inverse variance weighted
				Weighted mode	0.22	0.27	1.24(0.72-2.12)	0.515	0.953							Weighted mode
genus	Lachnospiraceae NK4A136 group	T1D	13	MR Egger	0.45	0.26	1.57(0.94-2.62)	0.11	0.972							MR Egger
				Weighted median	0.06	0.13	1.06(0.83-1.35)	0.641	0.896							Weighted median
				Inverse variance weighted	0.08	0.1	1.09(0.90-1.32)	0.392	0.962							Inverse variance weighted
				Weighted mode	-0.18	0.24	0.83(0.52-1.32)	0.452	0.953							Weighted mode
genus	Lachnospiraceae UCG001	T1D	9	MR Egger	-0.03	0.74	0.97(0.23-4.16)	0.97	0.988							MR Egger
				Weighted median	-0.08	0.12	0.92(0.73-1.15)	0.469	0.889							Weighted median
				Inverse variance weighted	0.06	0.11	1.06(0.86-1.31)	0.571	0.978							Inverse variance weighted
				Weighted mode	-0.18	0.18	0.84(0.59-1.18)	0.337	0.953							Weighted mode
genus	Lachnospiraceae UCG004	T1D	11	MR Egger	0.08	0.45	1.08(0.44-2.63)	0.871	0.988							MR Egger
				Weighted median	0.07	0.11	1.08(0.86-1.35)	0.527	0.889							Weighted median
				Inverse variance weighted	0.06	0.09	1.07(0.89-1.27)	0.475	0.978							Inverse variance weighted
				Weighted mode	0.07	0.18	1.07(0.76-1.53)	0.697	0.953							Weighted mode
genus	Lachnospiraceae UCG008	T1D	11	MR Egger	-0.29	0.36	0.75(0.37-1.51)	0.437	0.972	13.119	0.217	0.014	0.037	0.708	19	MR Egger	0.05	0.1	1.05(0.87-1.27)	0.612
				Weighted median	-0.12	0.08	0.89(0.76-1.05)	0.165	0.858							Weighted median	0.04	0.04	1.04(0.96-1.13)	0.369
				Inverse variance weighted	-0.15	0.07	0.86(0.75-0.97)	0.019	0.588							Inverse variance weighted	0.04	0.04	1.04(0.97-1.12)	0.233
				Weighted mode	-0.11	0.13	0.89(0.68-1.17)	0.41	0.953							Weighted mode	0.05	0.05	1.05(0.96-1.15)	0.289
genus	Lachnospiraceae UCG010	T1D	9	MR Egger	-0.14	0.36	0.87(0.43-1.78)	0.719	0.988							MR Egger
				Weighted median	-0.21	0.13	0.81(0.62-1.04)	0.103	0.856							Weighted median
				Inverse variance weighted	-0.17	0.12	0.84(0.67-1.06)	0.146	0.722							Inverse variance weighted
				Weighted mode	-0.27	0.18	0.76(0.54-1.08)	0.169	0.953							Weighted mode
genus	Lachnospira	T1D	6	MR Egger	0.31	0.79	1.37(0.29-6.40)	0.709	0.988							MR Egger
				Weighted median	-0.17	0.17	0.84(0.61-1.17)	0.304	0.858							Weighted median
				Inverse variance weighted	-0.19	0.13	0.82(0.64-1.07)	0.147	0.722							Inverse variance weighted
				Weighted mode	-0.33	0.23	0.72(0.46-1.13)	0.211	0.953							Weighted mode
genus	Lactobacillus	T1D	8	MR Egger	-0.10	0.16	0.91(0.67-1.23)	0.552	0.988							MR Egger
				Weighted median	-0.04	0.08	0.96(0.82-1.13)	0.65	0.896							Weighted median
				Inverse variance weighted	-0.00	0.06	1.00(0.88-1.12)	0.941	0.986							Inverse variance weighted
				Weighted mode	-0.05	0.11	0.95(0.77-1.17)	0.648	0.953							Weighted mode
genus	Lactococcus	T1D	9	MR Egger	0.24	0.26	1.27(0.77-2.10)	0.383	0.972							MR Egger
				Weighted median	0.06	0.08	1.06(0.91-1.24)	0.427	0.87							Weighted median
				Inverse variance weighted	0	0.06	1.00(0.90-1.12)	0.977	0.986							Inverse variance weighted
				Weighted mode	0.09	0.12	1.10(0.86-1.40)	0.488	0.953							Weighted mode
genus	Marvinbryantia	T1D	10	MR Egger	0.31	0.33	1.36(0.71-2.63)	0.381	0.972							MR Egger
				Weighted median	0.08	0.11	1.08(0.87-1.35)	0.469	0.889							Weighted median
				Inverse variance weighted	0.1	0.09	1.10(0.93-1.30)	0.264	0.822							Inverse variance weighted
				Weighted mode	0.07	0.16	1.07(0.78-1.47)	0.69	0.953							Weighted mode
genus	Oscillibacter	T1D	11	MR Egger	-0.09	0.36	0.92(0.45-1.84)	0.811	0.988							MR Egger
				Weighted median	-0.10	0.1	0.91(0.75-1.10)	0.315	0.858							Weighted median
				Inverse variance weighted	-0.11	0.09	0.90(0.75-1.07)	0.224	0.822							Inverse variance weighted
				Weighted mode	-0.03	0.16	0.97(0.71-1.31)	0.831	0.965							Weighted mode
genus	Oscillospira	T1D	8	MR Egger	-0.72	0.35	0.48(0.24-0.97)	0.085	0.972							MR Egger
				Weighted median	-0.07	0.11	0.93(0.75-1.16)	0.546	0.893							Weighted median
				Inverse variance weighted	-0.08	0.08	0.92(0.78-1.08)	0.308	0.835							Inverse variance weighted
				Weighted mode	-0.01	0.17	0.99(0.70-1.38)	0.936	0.965							Weighted mode
genus	Peptococcus	T1D	11	MR Egger	0.1	0.29	1.11(0.62-1.96)	0.736	0.988							MR Egger
				Weighted median	0.08	0.08	1.08(0.92-1.26)	0.335	0.858							Weighted median
				Inverse variance weighted	0.05	0.07	1.05(0.93-1.20)	0.429	0.978							Inverse variance weighted
				Weighted mode	0.11	0.13	1.12(0.86-1.45)	0.416	0.953							Weighted mode
genus	Phascolarctobacterium	T1D	8	MR Egger	0.34	0.42	1.41(0.62-3.20)	0.447	0.972							MR Egger
				Weighted median	-0.05	0.12	0.95(0.75-1.20)	0.673	0.896							Weighted median
				Inverse variance weighted	-0.10	0.09	0.90(0.76-1.08)	0.27	0.822							Inverse variance weighted
				Weighted mode	-0.00	0.2	1.00(0.67-1.48)	0.995	1							Weighted mode
genus	Romboutsia	T1D	12	MR Egger	0.03	0.27	1.03(0.61-1.73)	0.918	0.988							MR Egger
				Weighted median	-0.18	0.11	0.84(0.68-1.03)	0.096	0.856							Weighted median
				Inverse variance weighted	-0.15	0.08	0.86(0.74-1.01)	0.071	0.64							Inverse variance weighted
				Weighted mode	-0.20	0.19	0.82(0.57-1.18)	0.317	0.953							Weighted mode
genus	Roseburia	T1D	13	MR Egger	-0.36	0.28	0.70(0.40-1.21)	0.225	0.972							MR Egger
				Weighted median	0.02	0.12	1.02(0.80-1.30)	0.881	0.978							Weighted median
				Inverse variance weighted	-0.04	0.1	0.96(0.79-1.16)	0.682	0.978							Inverse variance weighted
				Weighted mode	0.06	0.19	1.06(0.73-1.54)	0.768	0.953							Weighted mode
genus	Ruminiclostridium5	T1D	10	MR Egger	-0.61	0.4	0.54(0.25-1.19)	0.164	0.972							MR Egger
				Weighted median	-0.18	0.13	0.83(0.65-1.07)	0.161	0.858							Weighted median
				Inverse variance weighted	-0.11	0.1	0.89(0.74-1.08)	0.246	0.822							Inverse variance weighted
				Weighted mode	-0.20	0.18	0.82(0.57-1.17)	0.299	0.953							Weighted mode
genus	Ruminiclostridium6	T1D	13	MR Egger	-0.18	0.25	0.83(0.51-1.35)	0.475	0.972							MR Egger
				Weighted median	0.09	0.12	1.10(0.87-1.38)	0.424	0.87							Weighted median
				Inverse variance weighted	0.03	0.1	1.03(0.84-1.26)	0.789	0.986							Inverse variance weighted
				Weighted mode	0.18	0.17	1.20(0.86-1.66)	0.306	0.953							Weighted mode
genus	Ruminiclostridium9	T1D	7	MR Egger	-0.21	0.65	0.81(0.22-2.92)	0.759	0.988							MR Egger
				Weighted median	-0.05	0.16	0.95(0.69-1.31)	0.754	0.896							Weighted median
				Inverse variance weighted	0.04	0.13	1.04(0.80-1.36)	0.752	0.986							Inverse variance weighted
				Weighted mode	-0.13	0.22	0.88(0.57-1.35)	0.572	0.953							Weighted mode
genus	Ruminococcaceae NK4A214 group	T1D	12	MR Egger	0.03	0.27	1.03(0.61-1.76)	0.911	0.988							MR Egger
				Weighted median	-0.06	0.12	0.94(0.75-1.19)	0.621	0.896							Weighted median
				Inverse variance weighted	0.02	0.08	1.02(0.86-1.20)	0.848	0.986							Inverse variance weighted
				Weighted mode	-0.08	0.16	0.92(0.67-1.26)	0.611	0.953							Weighted mode
genus	Ruminococcaceae UCG002	T1D	18	MR Egger	0.35	0.19	1.42(0.98-2.04)	0.08	0.972							MR Egger
				Weighted median	0.15	0.1	1.16(0.96-1.41)	0.124	0.858							Weighted median
				Inverse variance weighted	0.11	0.08	1.12(0.96-1.30)	0.137	0.722							Inverse variance weighted
				Weighted mode	0.22	0.15	1.24(0.93-1.66)	0.163	0.953							Weighted mode
genus	Ruminococcaceae UCG003	T1D	11	MR Egger	0.14	0.26	1.14(0.69-1.90)	0.614	0.988							MR Egger
				Weighted median	-0.00	0.1	1.00(0.81-1.22)	0.962	0.978							Weighted median
				Inverse variance weighted	-0.02	0.08	0.98(0.84-1.15)	0.841	0.986							Inverse variance weighted
				Weighted mode	-0.01	0.17	0.99(0.71-1.37)	0.938	0.965							Weighted mode
genus	Ruminococcaceae UCG004	T1D	11	MR Egger	0.28	0.39	1.32(0.61-2.84)	0.495	0.972							MR Egger
				Weighted median	0.08	0.09	1.09(0.91-1.31)	0.365	0.858							Weighted median
				Inverse variance weighted	0.11	0.07	1.12(0.97-1.28)	0.115	0.69							Inverse variance weighted
				Weighted mode	-0.02	0.18	0.98(0.69-1.39)	0.908	0.965							Weighted mode
genus	Ruminococcaceae UCG005	T1D	13	MR Egger	-0.14	0.2	0.87(0.59-1.28)	0.492	0.972							MR Egger
				Weighted median	-0.06	0.1	0.95(0.78-1.15)	0.567	0.896							Weighted median
				Inverse variance weighted	-0.04	0.07	0.96(0.83-1.11)	0.58	0.978							Inverse variance weighted
				Weighted mode	-0.06	0.13	0.94(0.72-1.22)	0.654	0.953							Weighted mode
genus	Ruminococcaceae UCG009	T1D	11	MR Egger	0.05	0.28	1.06(0.61-1.84)	0.853	0.988							MR Egger
				Weighted median	0.12	0.09	1.12(0.95-1.33)	0.176	0.858							Weighted median
				Inverse variance weighted	0.07	0.07	1.07(0.94-1.23)	0.296	0.835							Inverse variance weighted
				Weighted mode	0.14	0.14	1.15(0.87-1.51)	0.34	0.953							Weighted mode
genus	Ruminococcaceae UCG010	T1D	6	MR Egger	-0.27	0.28	0.76(0.44-1.31)	0.382	0.972	1.083	0.956	0.005	0.02	0.821	19	MR Egger	0.01	0.06	1.01(0.90-1.13)	0.858
				Weighted median	-0.21	0.13	0.81(0.63-1.04)	0.097	0.856							Weighted median	0.05	0.03	1.05(0.99-1.11)	0.13
				Inverse variance weighted	-0.21	0.1	0.81(0.66-0.99)	0.038	0.588							Inverse variance weighted	0.01	0.02	1.01(0.97-1.06)	0.511
				Weighted mode	-0.22	0.16	0.80(0.58-1.11)	0.236	0.953							Weighted mode	0.04	0.04	1.04(0.97-1.12)	0.328
genus	Ruminococcaceae UCG011	T1D	8	MR Egger	-0.27	0.32	0.76(0.41-1.43)	0.43	0.972							MR Egger
				Weighted median	0.02	0.07	1.02(0.89-1.16)	0.758	0.896							Weighted median
				Inverse variance weighted	0.03	0.06	1.03(0.91-1.17)	0.663	0.978							Inverse variance weighted
				Weighted mode	0.01	0.1	1.01(0.84-1.21)	0.923	0.965							Weighted mode
genus	Ruminococcaceae UCG013	T1D	12	MR Egger	0	0.24	1.00(0.63-1.61)	0.989	0.994							MR Egger
				Weighted median	-0.00	0.12	1.00(0.79-1.26)	0.978	0.978							Weighted median
				Inverse variance weighted	0.01	0.08	1.01(0.85-1.19)	0.918	0.986							Inverse variance weighted
				Weighted mode	-0.02	0.18	0.98(0.71-1.36)	0.925	0.965							Weighted mode
genus	Ruminococcaceae UCG014	T1D	10	MR Egger	-0.19	0.18	0.82(0.58-1.18)	0.32	0.972							MR Egger
				Weighted median	-0.10	0.12	0.90(0.72-1.13)	0.368	0.858							Weighted median
				Inverse variance weighted	-0.09	0.08	0.92(0.78-1.07)	0.269	0.822							Inverse variance weighted
				Weighted mode	-0.12	0.12	0.89(0.70-1.13)	0.363	0.953							Weighted mode
genus	Ruminococcus1	T1D	10	MR Egger	-0.18	0.25	0.84(0.51-1.36)	0.493	0.972							MR Egger
				Weighted median	-0.08	0.12	0.92(0.73-1.17)	0.499	0.889							Weighted median
				Inverse variance weighted	-0.11	0.09	0.89(0.75-1.06)	0.2	0.822							Inverse variance weighted
				Weighted mode	-0.04	0.21	0.96(0.64-1.45)	0.856	0.965							Weighted mode
genus	Ruminococcus2	T1D	15	MR Egger	0.22	0.25	1.24(0.76-2.04)	0.407	0.972	33.898	0.002	-0.016	0.02	0.432		MR Egger
				Weighted median	0.19	0.11	1.22(0.98-1.51)	0.064	0.856							Weighted median
				Inverse variance weighted	0.03	0.1	1.03(0.84-1.26)	0.769	0.986							Inverse variance weighted
				Weighted mode	0.25	0.11	1.29(1.02-1.63)	0.038	0.953							Weighted mode
genus	Ruminococcus gauvreauii group	T1D	11	MR Egger	-0.48	0.4	0.62(0.28-1.35)	0.261	0.972							MR Egger
				Weighted median	0.04	0.12	1.04(0.83-1.31)	0.738	0.896							Weighted median
				Inverse variance weighted	-0.07	0.1	0.93(0.77-1.13)	0.466	0.978							Inverse variance weighted
				Weighted mode	0.1	0.19	1.10(0.73-1.65)	0.626	0.953							Weighted mode
genus	Ruminococcus gnavus group	T1D	12	MR Egger	0.16	0.32	1.17(0.62-2.21)	0.637	0.988							MR Egger
				Weighted median	0.03	0.08	1.03(0.89-1.20)	0.673	0.896							Weighted median
				Inverse variance weighted	0.04	0.07	1.04(0.91-1.18)	0.584	0.978							Inverse variance weighted
				Weighted mode	-0.01	0.14	0.99(0.76-1.29)	0.935	0.965							Weighted mode
genus	Ruminococcus torques group	T1D	4	MR Egger	-6.83e-01	0.6	0.50(0.16-1.64)	0.374	0.972							MR Egger
				Weighted median	-2.97e-02	0.22	0.97(0.65-1.46)	0.891	0.978							Weighted median
				Inverse variance weighted	-4.05e-02	0.18	0.96(0.68-1.36)	0.819	0.986							Inverse variance weighted
				Weighted mode	9.32e-06	0.29	1.00(0.57-1.75)	1	1							Weighted mode
genus	Sellimonas	T1D	9	MR Egger	0.21	0.25	1.24(0.75-2.03)	0.425	0.972							MR Egger
				Weighted median	0.08	0.06	1.08(0.97-1.21)	0.171	0.858							Weighted median
				Inverse variance weighted	0.05	0.04	1.05(0.97-1.15)	0.228	0.822							Inverse variance weighted
				Weighted mode	0.07	0.09	1.07(0.91-1.27)	0.425	0.953							Weighted mode
genus	Streptococcus	T1D	11	MR Egger	0.08	0.33	1.08(0.57-2.06)	0.822	0.988							MR Egger
				Weighted median	-0.01	0.12	0.99(0.78-1.27)	0.964	0.978							Weighted median
				Inverse variance weighted	-0.02	0.09	0.98(0.82-1.17)	0.808	0.986							Inverse variance weighted
				Weighted mode	0.08	0.21	1.09(0.73-1.63)	0.696	0.953							Weighted mode
genus	Subdoligranulum	T1D	11	MR Egger	0.4	0.24	1.49(0.94-2.36)	0.126	0.972							MR Egger
				Weighted median	-0.12	0.13	0.89(0.69-1.13)	0.345	0.858							Weighted median
				Inverse variance weighted	0.01	0.1	1.01(0.83-1.23)	0.927	0.986							Inverse variance weighted
				Weighted mode	-0.14	0.21	0.87(0.56-1.34)	0.513	0.953							Weighted mode
genus	Terrisporobacter	T1D	5	MR Egger	0.45	0.28	1.58(0.92-2.70)	0.197	0.972							MR Egger
				Weighted median	0.05	0.12	1.05(0.84-1.32)	0.69	0.896							Weighted median
				Inverse variance weighted	0.06	0.09	1.06(0.88-1.26)	0.538	0.978							Inverse variance weighted
				Weighted mode	-0.07	0.19	0.94(0.66-1.34)	0.748	0.953							Weighted mode
genus	Turicibacter	T1D	9	MR Egger	0.27	0.3	1.31(0.72-2.38)	0.407	0.972							MR Egger
				Weighted median	0.04	0.1	1.04(0.87-1.24)	0.698	0.896							Weighted median
				Inverse variance weighted	0.04	0.07	1.04(0.90-1.19)	0.62	0.978							Inverse variance weighted
				Weighted mode	0.06	0.14	1.06(0.81-1.38)	0.692	0.953							Weighted mode
genus	Tyzzerella3	T1D	13	MR Egger	0.28	0.32	1.33(0.70-2.51)	0.401	0.972							MR Egger
				Weighted median	-0.06	0.07	0.94(0.82-1.07)	0.38	0.858							Weighted median
				Inverse variance weighted	-0.04	0.06	0.96(0.86-1.08)	0.508	0.978							Inverse variance weighted
				Weighted mode	-0.10	0.12	0.90(0.73-1.12)	0.407	0.953							Weighted mode
genus	Veillonella	T1D	5	MR Egger	-2.14	0.81	0.12(0.02-0.57)	0.077	0.972	9.763	0.045	0.18	0.062	0.063		MR Egger
				Weighted median	0.38	0.15	1.46(1.08(1.98)	0.01	0.36							Weighted median
				Inverse variance weighted	0.16	0.16	1.18(0.86-1.62)	0.313	0.835							Inverse variance weighted
				Weighted mode	0.39	0.18	1.47(1.01-2.15)	0.1	0.953							Weighted mode
Note: Nsnp, the number of snps involved; MR analysis, Mendelian randomization analysis. In the MR analysis, gut microbiota was treated as the exposure, T1D was treated as the outcome. In the reverse MR analysis, T1D was treated as the exposure, gut microbiota was treated as the outcome.

## Sheet: Supplementary table 5
Supplementary table 5. Mendelian randomization analysis results between Proteobacteria and T1D
Taxa	Gut microbiota	Trait	MR analysis											Reverse MR analysis
			Nsnp	Methods	Beta	SE	OR (95%CI)	P value	Heterogeneity		Horizontal pleiotropy			Nsnp	Methods	Beta	SE	OR (95%CI)	P value	Heterogeneity		Horizontal pleiotropy
									Cochran’s Q	P value	Egger intercept	SE	P value							Cochran’s Q	P value	Egger intercept	SE	P value
phylum	Proteobacteria	T1D	12	MR Egger	-0.03	0.31	0.97(0.53-1.77)	0.932							MR Egger
				Weighted median	0.03	0.12	1.03(0.81-1.31)	0.825							Weighted median
				Inverse variance weighted	0.01	0.1	1.01(0.82-1.24)	0.942							Inverse variance weighted
				Weighted mode	0.07	0.17	1.07(0.74-1.56)	0.681							Weighted mode
class	Alphaproteobacteria	T1D	7	MR Egger	-0.11	0.35	0.90(0.45-1.77)	0.768							MR Egger
				Weighted median	0.06	0.11	1.06(0.85-1.33)	0.6							Weighted median
				Inverse variance weighted	0.07	0.09	1.07(0.90-1.27)	0.444							Inverse variance weighted
				Weighted mode	0.04	0.15	1.04(0.77-1.40)	0.824							Weighted mode
class	Betaproteobacteria	T1D	10	MR Egger	0.13	0.32	1.14(0.61-2.13)	0.702							MR Egger
				Weighted median	-0.06	0.13	0.94(0.73-1.22)	0.663							Weighted median
				Inverse variance weighted	-0.01	0.1	0.99(0.82-1.19)	0.892							Inverse variance weighted
				Weighted mode	-0.13	0.22	0.88(0.57-1.36)	0.57							Weighted mode
class	Deltaproteobacteria	T1D	10	MR Egger	-0.75	0.78	0.47(0.10-2.17)	0.361							MR Egger
				Weighted median	0	0.15	1.00(0.75-1.34)	0.998							Weighted median
				Inverse variance weighted	-0.05	0.15	0.95(0.71-1.27)	0.736							Inverse variance weighted
				Weighted mode	-0.24	0.33	0.78(0.42-1.46)	0.483							Weighted mode
class	Gammaproteobacteria	T1D	6	MR Egger	-0.19	1.06	0.83(0.10-6.65)	0.87							MR Egger
				Weighted median	-0.06	0.17	0.94(0.67-1.32)	0.72							Weighted median
				Inverse variance weighted	0.04	0.14	1.04(0.79-1.37)	0.764							Inverse variance weighted
				Weighted mode	-0.15	0.26	0.86(0.52-1.42)	0.578							Weighted mode
order	Burkholderiales	T1D	10	MR Egger	0.08	0.32	1.09(0.58-2.03)	0.802							MR Egger
				Weighted median	-0.06	0.13	0.94(0.73-1.21)	0.639							Weighted median
				Inverse variance weighted	-0.02	0.1	0.98(0.81-1.18)	0.828							Inverse variance weighted
				Weighted mode	-0.14	0.21	0.87(0.56-1.34)	0.537							Weighted mode
order	Desulfovibrionales	T1D	9	MR Egger	-1.12	0.65	0.32(0.09-1.17)	0.129							MR Egger
				Weighted median	-0.16	0.15	0.85(0.64-1.13)	0.276							Weighted median
				Inverse variance weighted	-0.20	0.14	0.82(0.62-1.08)	0.158							Inverse variance weighted
				Weighted mode	-0.04	0.27	0.96(0.59-1.57)	0.877							Weighted mode
order	Enterobacterales	T1D	7	MR Egger	1.48	0.66	4.41(1.22-15.91)	0.073							MR Egger
				Weighted median	-0.08	0.16	0.93(0.67-1.27)	0.624							Weighted median
				Inverse variance weighted	0.04	0.13	1.04(0.81-1.34)	0.742							Inverse variance weighted
				Weighted mode	-0.20	0.29	0.82(0.45-1.49)	0.514							Weighted mode
order	Pasteurellales	T1D	13	MR Egger	0.24	0.19	1.27(0.88-1.83)	0.234							MR Egger
				Weighted median	0.15	0.09	1.16(0.98-1.38)	0.087							Weighted median
				Inverse variance weighted	0.13	0.08	1.14(0.98-1.34)	0.097							Inverse variance weighted
				Weighted mode	0.12	0.11	1.12(0.91-1.39)	0.323							Weighted mode
order	Rhodospirillales	T1D	14	MR Egger	0.21	0.23	1.24(0.79-1.93)	0.37							MR Egger
				Weighted median	-0.00	0.08	1.00(0.86-1.16)	0.988							Weighted median
				Inverse variance weighted	0.01	0.06	1.01(0.90-1.12)	0.907							Inverse variance weighted
				Weighted mode	-0.07	0.12	0.93(0.73-1.19)	0.581							Weighted mode
family	Alcaligenaceae	T1D	11	MR Egger	-0.46	0.44	0.63(0.27-1.49)	0.325							MR Egger
				Weighted median	-0.11	0.13	0.89(0.69-1.15)	0.376							Weighted median
				Inverse variance weighted	-0.08	0.1	0.92(0.76-1.11)	0.387							Inverse variance weighted
				Weighted mode	-0.18	0.2	0.83(0.56-1.24)	0.376							Weighted mode
family	Desulfovibrionaceae	T1D	5	MR Egger	-0.40	0.62	0.67(0.20-2.26)	0.564							MR Egger
				Weighted median	-0.19	0.18	0.83(0.59-1.17)	0.291							Weighted median
				Inverse variance weighted	-0.20	0.13	0.82(0.63-1.07)	0.142							Inverse variance weighted
				Weighted mode	-0.32	0.25	0.73(0.46-1.14)	0.27							Weighted mode
family	Enterobacteriaceae	T1D	7	MR Egger	1.48	0.66	4.41(1.22-15.91)	0.073							MR Egger
				Weighted median	-0.08	0.17	0.93(0.67-1.28)	0.641							Weighted median
				Inverse variance weighted	0.04	0.13	1.04(0.81-1.34)	0.742							Inverse variance weighted
				Weighted mode	-0.20	0.28	0.82(0.47-1.41)	0.498							Weighted mode
family	Oxalobacteraceae	T1D	12	MR Egger	-0.21	0.25	0.81(0.50-1.32)	0.427							MR Egger
				Weighted median	-0.10	0.07	0.91(0.79-1.04)	0.155							Weighted median
				Inverse variance weighted	-0.11	0.06	0.90(0.80-1.01)	0.078							Inverse variance weighted
				Weighted mode	-0.10	0.09	0.90(0.74-1.09)	0.277							Weighted mode
family	Pasteurellaceae	T1D	12	MR Egger	0.22	0.19	1.25(0.86-1.80)	0.267							MR Egger
				Weighted median	0.12	0.09	1.13(0.95-1.35)	0.162							Weighted median
				Inverse variance weighted	0.12	0.08	1.12(0.96-1.32)	0.156							Inverse variance weighted
				Weighted mode	0.12	0.11	1.12(0.91-1.38)	0.317							Weighted mode
family	Rhodospirillaceae	T1D	15	MR Egger	0.21	0.23	1.24(0.78-1.96)	0.378							MR Egger
				Weighted median	-0.02	0.08	0.98(0.84-1.14)	0.78							Weighted median
				Inverse variance weighted	-0.00	0.05	1.00(0.89-1.11)	0.944							Inverse variance weighted
				Weighted mode	-0.07	0.13	0.93(0.74-1.18)	0.598							Weighted mode
genus	Bilophila	T1D	12	MR Egger	0.16	0.44	1.17(0.49-2.78)	0.73							MR Egger
				Weighted median	0.1	0.11	1.10(0.89-1.37)	0.377							Weighted median
				Inverse variance weighted	0.13	0.09	1.14(0.95-1.35)	0.15							Inverse variance weighted
				Weighted mode	0.1	0.18	1.11(0.77-1.60)	0.581							Weighted mode
genus	Desulfovibrio	T1D	10	MR Egger	-0.31	0.28	0.73(0.42-1.27)	0.299							MR Egger
				Weighted median	0.01	0.1	1.01(0.82-1.24)	0.94							Weighted median
				Inverse variance weighted	-0.06	0.09	0.94(0.78-1.13)	0.521							Inverse variance weighted
				Weighted mode	0.07	0.17	1.07(0.76-1.49)	0.705							Weighted mode
genus	Escherichia Shigella	T1D	9	MR Egger	-0.61	0.32	0.54(0.29-1.01)	0.095							MR Egger
				Weighted median	-0.19	0.13	0.82(0.63-1.07)	0.147							Weighted median
				Inverse variance weighted	-0.07	0.12	0.93(0.73-1.18)	0.565							Inverse variance weighted
				Weighted mode	-0.28	0.21	0.76(0.50-1.15)	0.226							Weighted mode
genus	Haemophilus	T1D	9	MR Egger	-0.13	0.21	0.88(0.58-1.33)	0.553							MR Egger
				Weighted median	0.01	0.1	1.01(0.83-1.22)	0.946							Weighted median
				Inverse variance weighted	-0.03	0.09	0.97(0.81-1.16)	0.718							Inverse variance weighted
				Weighted mode	0.03	0.13	1.03(0.79-1.34)	0.825							Weighted mode
genus	Oxalobacter	T1D	11	MR Egger	-0.15	0.26	0.86(0.51-1.44)	0.574							MR Egger
				Weighted median	-0.09	0.07	0.91(0.80-1.04)	0.172							Weighted median
				Inverse variance weighted	-0.07	0.05	0.93(0.84-1.03)	0.181							Inverse variance weighted
				Weighted mode	-0.08	0.09	0.92(0.77-1.11)	0.413							Weighted mode
genus	Parasutterella	T1D	14	MR Egger	-0.00	0.17	1.00(0.71-1.40)	0.998							MR Egger
				Weighted median	-0.00	0.09	1.00(0.84-1.18)	0.961							Weighted median
				Inverse variance weighted	0.02	0.06	1.02(0.91-1.16)	0.695							Inverse variance weighted
				Weighted mode	-0.01	0.12	0.99(0.78-1.27)	0.963							Weighted mode
genus	Sutterella	T1D	12	MR Egger	-0.31	0.34	0.74(0.38-1.44)	0.389							MR Egger
				Weighted median	0.04	0.11	1.04(0.84-1.29)	0.735							Weighted median
				Inverse variance weighted	0	0.08	1.00(0.86-1.17)	0.963							Inverse variance weighted
				Weighted mode	0.12	0.19	1.12(0.76-1.65)	0.566							Weighted mode
Note: Nsnp, the number of snps involved; MR analysis, Mendelian randomization analysis. In the MR analysis, gut microbiota was treated as the exposure, T1D was treated as the outcome. In the reverse MR analysis, T1D was treated as the exposure, gut microbiota was treated as the outcome.

## Sheet: Supplementary table 6
Supplementary table 6. Mendelian randomization analysis results between the other five phyla, subcategories and T1D
Taxa	Gut microbiota	Trait	MR analysis												Reverse MR analysis
			Nsnp	Methods	Beta	SE	OR (95%CI)	P value	PFDR	Heterogeneity		Horizontal pleiotropy			Nsnp	Methods	Beta	SE	OR (95%CI)	P value	Heterogeneity		Horizontal pleiotropy
										Cochran’s Q	P value	Egger intercept	SE	P value							Cochran’s Q	P value	Egger intercept	SE	P value
phylum	Cyanobacteria	T1D	8	MR Egger	-0.12	0.25	0.89(0.54-1.44)	0.642								MR Egger
				Weighted median	0	0.09	1.00(0.84-1.18)	0.999								Weighted median
				Inverse variance weighted	0.04	0.07	1.04(0.91-1.20)	0.536								Inverse variance weighted
				Weighted mode	0	0.12	1.00(0.79-1.27)	0.993								Weighted mode
phylum	Euryarchaeota	T1D	11	MR Egger	0.14	0.23	1.15(0.73-1.81)	0.567								MR Egger
				Weighted median	0.03	0.06	1.03(0.91-1.16)	0.668								Weighted median
				Inverse variance weighted	0.03	0.05	1.03(0.94-1.14)	0.528								Inverse variance weighted
				Weighted mode	-0.06	0.1	0.94(0.78-1.13)	0.558								Weighted mode
class	Methanobacteria	T1D	9	MR Egger	0.13	0.25	1.14(0.69-1.86)	0.626								MR Egger
				Weighted median	0.06	0.07	1.06(0.92-1.22)	0.434								Weighted median
				Inverse variance weighted	0.05	0.06	1.06(0.94-1.19)	0.363								Inverse variance weighted
				Weighted mode	0.08	0.11	1.08(0.85-1.38)	0.523								Weighted mode
order	Methanobacteriales	T1D	9	MR Egger	0.13	0.25	1.14(0.69-1.86)	0.626								MR Egger
				Weighted median	0.06	0.07	1.06(0.92-1.23)	0.412								Weighted median
				Inverse variance weighted	0.05	0.06	1.06(0.94-1.19)	0.363								Inverse variance weighted
				Weighted mode	0.08	0.12	1.08(0.83-1.40)	0.554								Weighted mode
family	Methanobacteriaceae	T1D	9	MR Egger	0.13	0.25	1.14(0.69-1.86)	0.626								MR Egger
				Weighted median	0.06	0.07	1.06(0.92-1.21)	0.419								Weighted median
				Inverse variance weighted	0.05	0.06	1.06(0.94-1.19)	0.363								Inverse variance weighted
				Weighted mode	0.08	0.12	1.08(0.85-1.36)	0.542								Weighted mode
genus	Methanobrevibacter	T1D	6	MR Egger	0.39	0.27	1.48(0.87-2.51)	0.225								MR Egger
				Weighted median	0.06	0.09	1.06(0.89-1.26)	0.532								Weighted median
				Inverse variance weighted	0.07	0.08	1.07(0.92-1.24)	0.376								Inverse variance weighted
				Weighted mode	0.06	0.12	1.06(0.83-1.34)	0.666								Weighted mode
phylum	Lentisphaerae	T1D	8	MR Egger	0.28	0.31	1.32(0.72-2.42)	0.397								MR Egger
				Weighted median	-0.02	0.08	0.98(0.83-1.14)	0.763								Weighted median
				Inverse variance weighted	-0.02	0.07	0.98(0.85-1.12)	0.731								Inverse variance weighted
				Weighted mode	-0.03	0.13	0.97(0.76-1.26)	0.847								Weighted mode
class	Lentisphaeria	T1D	7	MR Egger	0.15	0.28	1.16(0.68-2.00)	0.61								MR Egger
				Weighted median	-0.04	0.09	0.96(0.81-1.13)	0.617								Weighted median
				Inverse variance weighted	-0.07	0.07	0.93(0.82-1.06)	0.293								Inverse variance weighted
				Weighted mode	-0.02	0.12	0.98(0.77-1.25)	0.867								Weighted mode
order	Victivallales	T1D	7	MR Egger	0.15	0.28	1.16(0.68-2.00)	0.61								MR Egger
				Weighted median	-0.04	0.09	0.96(0.81-1.13)	0.62								Weighted median
				Inverse variance weighted	-0.07	0.07	0.93(0.82-1.06)	0.293								Inverse variance weighted
				Weighted mode	-0.02	0.13	0.98(0.76-1.26)	0.875								Weighted mode
family	Lentisphaeria	T1D	16	MR Egger	0.47	0.29	1.60(0.90-2.83)	0.128								MR Egger
				Weighted median	0.12	0.12	1.12(0.89-1.42)	0.329								Weighted median
				Inverse variance weighted	0.01	0.09	1.01(0.85-1.20)	0.912								Inverse variance weighted
				Weighted mode	0.19	0.22	1.21(0.80-1.84)	0.388								Weighted mode
family	Victivallaceae	T1D	11	MR Egger	-0.11	0.29	0.90(0.51-1.59)	0.718								MR Egger
				Weighted median	-0.00	0.06	1.00(0.88-1.12)	0.948								Weighted median
				Inverse variance weighted	-0.01	0.06	0.99(0.89-1.11)	0.896								Inverse variance weighted
				Weighted mode	-0.01	0.08	0.99(0.85-1.17)	0.942								Weighted mode
genus	Victivallis	T1D	10	MR Egger	0.33	0.5	1.39(0.53-3.69)	0.522								MR Egger
				Weighted median	0.06	0.07	1.06(0.93-1.21)	0.355								Weighted median
				Inverse variance weighted	0.06	0.06	1.06(0.94-1.20)	0.321								Inverse variance weighted
				Weighted mode	0.01	0.13	1.01(0.79-1.29)	0.946								Weighted mode
phylum	Tenericutes	T1D	10	MR Egger	-0.28	0.36	0.76(0.37-1.52)	0.456	0.456	17.049	0.048	0.02	0.031	0.525		MR Egger
				Weighted median	-0.23	0.11	0.80(0.64-0.99)	0.037	0.037							Weighted median
				Inverse variance weighted	-0.05	0.11	0.95(0.76-1.17)	0.618	0.618							Inverse variance weighted
				Weighted mode	-0.25	0.14	0.78(0.61-1.01)	0.106	0.106							Weighted mode
class	Mollicutes	T1D	10	MR Egger	-0.28	0.36	0.76(0.37-1.52)	0.456	0.684	17.049	0.048	0.02	0.031	0.525		MR Egger
				Weighted median	-0.23	0.11	0.80(0.64-1.00)	0.046	0.138							Weighted median
				Inverse variance weighted	-0.05	0.11	0.95(0.76-1.17)	0.618	0.958							Inverse variance weighted
				Weighted mode	-0.25	0.14	0.78(0.60-1.01)	0.115	0.345							Weighted mode
order	Mollicutes RF9	T1D	11	MR Egger	-0.04	0.27	0.96(0.57-1.62)	0.881	0.881							MR Egger
				Weighted median	-0.08	0.1	0.93(0.77-1.11)	0.436	0.654							Weighted median
				Inverse variance weighted	0	0.09	1.00(0.85-1.19)	0.958	0.958							Inverse variance weighted
				Weighted mode	-0.12	0.13	0.89(0.68-1.16)	0.396	0.594							Weighted mode
order	NB1n	T1D	12	MR Egger	-0.55	0.23	0.58(0.37-0.90)	0.036	0.108	13.383	0.269	0.066	0.026	0.028		MR Egger
				Weighted median	0.01	0.07	1.01(0.88-1.16)	0.917	0.917							Weighted median
				Inverse variance weighted	0.02	0.05	1.02(0.92-1.13)	0.704	0.958							Inverse variance weighted
				Weighted mode	-0.05	0.11	0.95(0.76-1.18)	0.643	0.643							Weighted mode
phylum	Verrucomicrobia	T1D	12	MR Egger	-0.07	0.19	0.93(0.64-1.35)	0.718								MR Egger
				Weighted median	-0.15	0.09	0.86(0.72-1.04)	0.114								Weighted median
				Inverse variance weighted	-0.12	0.07	0.89(0.77-1.02)	0.094								Inverse variance weighted
				Weighted mode	-0.16	0.14	0.85(0.65-1.12)	0.282								Weighted mode
class	Verrucomicrobiae	T1D	11	MR Egger	0.12	0.26	1.12(0.68-1.86)	0.656								MR Egger
				Weighted median	-0.07	0.1	0.93(0.77-1.13)	0.49								Weighted median
				Inverse variance weighted	-0.05	0.08	0.95(0.82-1.10)	0.471								Inverse variance weighted
				Weighted mode	-0.12	0.15	0.88(0.66-1.19)	0.43								Weighted mode
order	Verrucomicrobiales	T1D	11	MR Egger	0.12	0.26	1.12(0.68-1.86)	0.656								MR Egger
				Weighted median	-0.07	0.1	0.93(0.76-1.14)	0.479								Weighted median
				Inverse variance weighted	-0.05	0.08	0.95(0.82-1.10)	0.471								Inverse variance weighted
				Weighted mode	-0.12	0.14	0.88(0.66-1.19)	0.398								Weighted mode
family	Verrucomicrobiaceae	T1D	11	MR Egger	0.12	0.26	1.12(0.68-1.86)	0.656								MR Egger
				Weighted median	-0.07	0.1	0.93(0.77-1.14)	0.486								Weighted median
				Inverse variance weighted	-0.05	0.08	0.95(0.82-1.10)	0.471								Inverse variance weighted
				Weighted mode	-0.12	0.15	0.88(0.66-1.17)	0.43								Weighted mode
genus	Akkermansia	T1D	11	MR Egger	0.12	0.26	1.13(0.68-1.86)	0.652								MR Egger
				Weighted median	-0.07	0.1	0.93(0.77-1.14)	0.502								Weighted median
				Inverse variance weighted	-0.05	0.08	0.95(0.82-1.10)	0.472								Inverse variance weighted
				Weighted mode	-0.13	0.14	0.88(0.67-1.17)	0.4								Weighted mode
class	Melainabacteria	T1D	8	MR Egger	-0.06	0.2	0.94(0.63-1.41)	0.782								MR Egger
				Weighted median	0.1	0.08	1.11(0.94-1.30)	0.197								Weighted median
				Inverse variance weighted	0.08	0.06	1.08(0.96-1.23)	0.214								Inverse variance weighted
				Weighted mode	0.1	0.12	1.11(0.89-1.37)	0.412								Weighted mode
order	Gastranaerophilales	T1D	7	MR Egger	0.01	0.21	1.01(0.67-1.53)	0.958								MR Egger
				Weighted median	0.02	0.08	1.02(0.87-1.20)	0.816								Weighted median
				Inverse variance weighted	0.04	0.07	1.04(0.91-1.19)	0.563								Inverse variance weighted
				Weighted mode	-0.02	0.11	0.98(0.79-1.23)	0.896								Weighted mode
Note: Nsnp, the number of snps involved; MR analysis, Mendelian randomization analysis. In the MR analysis, gut microbiota was treated as the exposure, T1D was treated as the outcome. In the reverse MR analysis, T1D was treated as the exposure, gut microbiota was treated as the outcome.
